# Supplementary material
Source: publisher figshare collection journal article supplement (https://gsajournals.figshare.com/articles/dataset/_/6986945)
Supplement: Supplementary file 1 [file 1]

## Sheet: Sheet1
Fly_gene	Human_gene	Human_refseq	Human_site	Sequence	Kinase?
sff	BRSK1	NP_115806.1	563	NSFLGsPRFHR	Yes
CaMKII	CAMK2D	NP_001308498.1	307	GAILTtMLATR	Yes
Cdk1	CDK1	NP_001777.1	14	KIGEGtYGVVY	Yes
Cdk1	CDK1	NP_001777.1	15	IGEGTyGVVYK	Yes
Cdk5	CDK5	NP_004926.1	14	KIGEGtYGTVF	Yes
Cdk5	CDK5	NP_004926.1	15	IGEGTyGTVFK	Yes
Cdk7	CDK7	NP_001790.1	161	FGLAKsFGSPN	Yes
gish	CSNK1G3	XP_016864546.1	423	SVQVVsSTNGE	Yes
mnb	DYRK1A	XP_011527784.1	104	PLRKLsVDLIK	Yes
mnb	DYRK1B	NP_004705.1	49	PLRKLsVDLIK	Yes
Gprk2	GRK5	NP_005299.1	484	DIEQFsTVKGV	Yes
Gprk2	GRK5	NP_005299.1	485	IEQFStVKGVN	Yes
sgg	GSK3A	NP_063937.2	278	GEPNVsYICSR	Yes
sgg	GSK3A	NP_063937.2	279	EPNVSyICSRY	Yes
sgg	GSK3A	NP_063937.2	282	VSYICsRYYRA	Yes
gskt	GSK3B	NP_002084.2	216	EPNVSyICSRY	Yes
sgg	GSK3B	NP_002084.2	215	GEPNVsYICSR	Yes
sgg	GSK3B	NP_002084.2	216	EPNVSyICSRY	Yes
sgg	GSK3B	NP_002084.2	219	VSYICsRYYRA	Yes
Dsor1	MAP2K1	NP_002746.1	218	GQLIDsMANSF	Yes
Dsor1	MAP2K1	NP_002746.1	222	DSMANsFVGTR	Yes
rl	MAPK1	NP_620407.1	185	HTGFLtEYVAT	Yes
rl	MAPK1	NP_620407.1	187	GFLTEyVATRW	Yes
bsk	MAPK8	NP_620637.1	133	MSYLLyQMLCG	Yes
bsk	MAPK8	NP_620637.1	185	FMMTPyVVTRY	Yes
InR	IGF1R	XP_016877625.1	1186	MTRDIyETDYY	Yes
MAPk-Ak2	MAPKAPK3	NP_004626.1	204	LQTPCyTPYYV	Yes
polo	PLK1	NP_005021.2	210	GERKKtLCGTP	Yes
polo	PLK1	NP_005021.2	214	KTLCGtPNYIA	Yes
AMPKalpha	PRKAA2	NP_006243.2	172	GEFLRtSCGSP	Yes
AMPKalpha	PRKAA2	NP_006243.2	173	EFLRTsCGSPN	Yes
Pka-C1	PRKACA	NP_001291278.1	272	RVKGRtWTLCG	Yes
Pka-C1	PRKACA	NP_001291278.1	274	KGRTWtLCGTP	Yes
Pka-C1	PRKACA	NP_001291278.1	278	WTLCGtPEYLA	Yes
Pka-C1	PRKACB	NP_891993.1	243	RVKGRtWTLCG	Yes
Pka-C1	PRKACB	NP_891993.1	245	KGRTWtLCGTP	Yes
Pka-C1	PRKACB	NP_891993.1	249	WTLCGtPEYLA	Yes
aPKC	PRKCI	NP_002731.4	410	RPGDTtSTFCG	Yes
aPKC	PRKCI	NP_002731.4	411	PGDTTsTFCGT	Yes
aPKC	PRKCI	NP_002731.4	412	GDTTStFCGTP	Yes
for	PRKG1	NP_006249.1	536	WTFCGtPEYVA	Yes
S6k	RPS6KB1	NP_003152.1	256	HTFCGtIEYMA	Yes
S6k	RPS6KB2	NP_003943.2	232	HTFCGtIEYMA	Yes
SRPK	SRPK1	NP_003128.3	514	TEDIQtRQYRS	Yes
SRPK	SRPK2	XP_005250606.2	639	TEDIQtRQYRS	Yes
GckIII	STK24	XP_016876283.1	268	NTFVGtPFWMA	Yes
GckIII	STK26	NP_057626.2	182	NTFVGtPFWMA	Yes
hpo	STK3	XP_016869245.1	265	MAKRNtVIGTP	Yes
trc	STK38	NP_009202.1	444	VFINYtYKRFE	Yes
14-3-3epsilon	YWHAE	NP_006752.1	46	ERNLLsVAYKN
14-3-3zeta	YWHAZ	NP_003397.1	229	NLTLWtSDTQG
14-3-3zeta	YWHAZ	NP_003397.1	230	LTLWTsDTQGD
14-3-3zeta	YWHAZ	NP_003397.1	232	LWTSDtQGDEA
14-3-3zeta	YWHAZ	NP_003397.1	45	ERNLLsVAYKN
Act42A	ACTB	NP_001092.1	199	TERGYsFTTTA
Act42A	ACTB	NP_001092.1	233	ATAASsSSLEK
Act42A	ACTB	NP_001092.1	234	TAASSsSLEKS
Act42A	ACTB	NP_001092.1	235	AASSSsLEKSY
Act42A	ACTB	NP_001092.1	318	MQKEItALAPS
Act42A	ACTB	NP_001092.1	52	MGQKDsYVGDE
Act42A	ACTB	NP_001092.1	60	GDEAQsKRGIL
Act42A	ACTG1	NP_001605.1	199	TERGYsFTTTA
Act42A	ACTG1	NP_001605.1	233	ATAASsSSLEK
Act42A	ACTG1	NP_001605.1	234	TAASSsSLEKS
Act42A	ACTG1	NP_001605.1	235	AASSSsLEKSY
Act42A	ACTG1	NP_001605.1	318	MQKEItALAPS
Act42A	ACTG1	NP_001605.1	52	MGQKDsYVGDE
Act42A	ACTG1	NP_001605.1	60	GDEAQsKRGIL
Act57B	ACTB	NP_001092.1	199	TERGYsFTTTA
Act57B	ACTB	NP_001092.1	52	MGQKDsYVGDE
Act57B	ACTB	NP_001092.1	60	GDEAQsKRGIL
Act5C	ACTB	NP_001092.1	199	TERGYsFTTTA
Act5C	ACTB	NP_001092.1	233	ATAASsSSLEK
Act5C	ACTB	NP_001092.1	234	TAASSsSLEKS
Act5C	ACTB	NP_001092.1	235	AASSSsLEKSY
Act5C	ACTB	NP_001092.1	318	MQKEItALAPS
Act5C	ACTB	NP_001092.1	52	MGQKDsYVGDE
Act5C	ACTB	NP_001092.1	60	GDEAQsKRGIL
Act5C	ACTG1	NP_001605.1	199	TERGYsFTTTA
Act5C	ACTG1	NP_001605.1	233	ATAASsSSLEK
Act5C	ACTG1	NP_001605.1	234	TAASSsSLEKS
Act5C	ACTG1	NP_001605.1	235	AASSSsLEKSY
Act5C	ACTG1	NP_001605.1	318	MQKEItALAPS
Act5C	ACTG1	NP_001605.1	52	MGQKDsYVGDE
Act5C	ACTG1	NP_001605.1	60	GDEAQsKRGIL
Act79B	ACTB	NP_001092.1	199	TERGYsFTTTA
Act79B	ACTB	NP_001092.1	318	MQKEItALAPS
Act79B	ACTG2	NP_001606.1	319	MQKEItALAPS
Act87E	ACTB	NP_001092.1	199	TERGYsFTTTA
Act87E	ACTB	NP_001092.1	318	MQKEItALAPS
Act87E	ACTB	NP_001092.1	52	MGQKDsYVGDE
Act87E	ACTB	NP_001092.1	60	GDEAQsKRGIL
Act88F	ACTB	NP_001092.1	199	TERGYsFTTTA
Act88F	ACTB	NP_001092.1	318	MQKEItALAPS
Act88F	ACTB	NP_001092.1	52	MGQKDsYVGDE
Act88F	ACTB	NP_001092.1	60	GDEAQsKRGIL
alphaTub84B	TUBA3D	NP_525125.2	158	LMERLsVDYGK
alphaTub84B	TUBA3D	NP_525125.2	282	SAEKAyHEQLS
alphaTub84B	TUBA3D	NP_525125.2	287	YHEQLsVAEIT
alphaTub84B	TUBA3D	NP_525125.2	48	GGGDDsFNTFF
alphaTub84B	TUBA3D	NP_525125.2	54	FNTFFsETGAG
alphaTub84D	TUBA3D	NP_525125.2	158	LMERLsVDYGK
alphaTub84D	TUBA3D	NP_525125.2	282	SAEKAyHEQLS
alphaTub84D	TUBA3D	NP_525125.2	287	YHEQLsVAEIT
alphaTub84D	TUBA3D	NP_525125.2	48	GGGDDsFNTFF
alphaTub84D	TUBA3D	NP_525125.2	54	FNTFFsETGAG
alphaTub84D	TUBA3E	NP_997195.1	282	SAEKAyHEQLS
alphaTub84D	TUBA3E	NP_997195.1	287	YHEQLsVAEIT
alphaTub84D	TUBA3E	NP_997195.1	48	GGGDDsFNTFF
alphaTub84D	TUBA3E	NP_997195.1	54	FNTFFsETGAG
alphaTub85E	TUBA1A	NP_006000.2	158	LMERLsVDYGK
AP-2mu	AP2M1	NP_001298127.1	181	ITSQVtGQIGW
AP-2mu	AP2M1	NP_001298127.1	70	RQQVRsPVTNI
arm	CTNNB1	NP_001895.1	654	EGVATyAAAVL
Arp2	ACTR2	NP_001005386.1	250	LVESYtLPDGR
AspRS	DARS	NP_001340.2	249	AYLAQsPQLYK
Atg3	ATG3	NP_071933.2	20	VAEYLtPVLKE
ATPsynbeta	ATP5B	NP_001677.2	465	IQRFLsQPFQV
betaTub56D	TUBB4B	NP_006079.1	115	AELVDsVLDVV
betaTub56D	TUBB4B	NP_006079.1	274	GFAPLtSRGSQ
betaTub56D	TUBB4B	NP_006079.1	322	FRGRMsMKEVD
betaTub56D	TUBB4B	NP_006079.1	339	QNKNSsYFVEW
betaTub56D	TUBB4B	NP_006079.1	366	LKMSAtFIGNS
betaTub60D	TUBB6	NP_115914.1	274	GFAPLtSRGSQ
betaTub85D	TUBB4B	NP_006079.1	115	AELVDsVLDVV
betaTub85D	TUBB4B	NP_006079.1	274	GFAPLtSRGSQ
betaTub85D	TUBB4B	NP_006079.1	322	FRGRMsMKEVD
betaTub85D	TUBB4B	NP_006079.1	366	LKMSAtFIGNS
betaTub97EF	TUBB6	NP_115914.1	339	QSKNSsYFVEW
blw	ATP5A1	XP_016881278.1	134	DIVKRtGAIVD
blw	ATP5A1	XP_016881278.1	198	IKAVDsLVPIG
Bx42	SNW1	NP_001305773.1	224	PRGPPsPPAPV
Ca-alpha1D	CACNA1C	XP_016875415.1	1636	LTRDWsILGPH
Ca-alpha1D	CACNA1D	XP_011532396.1	1560	LTRDWsILGPH
Ca-alpha1D	CACNA1S	NP_000060.2	1392	LTRDWsILGPH
Cam	CALM1	XP_006720321.1	112	LRHVMtNLGEK
Cam	CALM1	XP_006720321.1	119	LGEKLtDEEVD
Cam	CALM1	XP_006720321.1	81	RKMKDtDSEEE
Cam	CALM1	XP_006720321.1	83	MKDTDsEEEIR
Cam	CALM3	NP_005175.2	111	LRHVMtNLGEK
Cam	CALM3	NP_005175.2	118	LGEKLtDEEVD
Cam	CALM3	NP_005175.2	80	RKMKDtDSEEE
Cam	CALM3	NP_005175.2	82	MKDTDsEEEIR
CanA-14F	PPP3CA	NP_000935.1	411	MARVFsVLREE
Cdc5	CDC5L	NP_001244.1	385	KGGLNtPLHES
CG10333	DDX23	NP_004809.2	525	EIVIAtPGRLI
CG1129	GMPPB	NP_037466.2	12	VGGYGtRLRPL
CG11700	UBB	NP_061828.1	217	NIQKEsTLHLV
CG13900	SF3B3	NP_036558.3	156	RLTISsPLEAH
CG17737	EIF1B	NP_005866.1	43	RNGRKtLTTVQ
CG2807	SF3B1	NP_036565.2	296	NRWDEtPKTER
CG30382	PSMA6	NP_002782.1	14	FDRHItIFSPE
CG30382	PSMA6	NP_002782.1	17	HITIFsPEGRL
CG30382	PSMA6	NP_002782.1	27	LYQVEyAFKAI
CG6664	CCDC6	NP_005427.2	327	LSESEsSLEMD
CG9548	PHF5A	NP_116147.1	94	VNLGSsKTDLF
Dgp-1	GTPBP1	XP_016884588.1	217	ESGRTsSVGND
Dgp-1	GTPBP1	XP_016884588.1	218	SGRTSsVGNDI
DnaJ-1	DNAJB4	NP_008965.2	38	PDKNKsPQAEE
Ef1alpha100E	EEF1A2	NP_001949.1	261	IGGIGtVPVGR
Ef1alpha100E	EEF1A2	NP_001949.1	29	TGHLIyKCGGI
Ef1alpha48D	EEF1A2	NP_001949.1	261	IGGIGtVPVGR
Ef1alpha48D	EEF1A2	NP_001949.1	29	TGHLIyKCGGI
EF2	EEF2	NP_001952.1	23	NIRNMsVIAHV
EF2	EEF2	NP_001952.1	435	MGPNYtPGKKE
EF2	EEF2	NP_001952.1	502	MKFSVsPVVRV
EF2	EEF2	NP_001952.1	57	GETRFtDTRKD
EF2	EEF2	NP_001952.1	59	TRFTDtRKDEQ
eIF-2alpha	EIF2S1	NP_004085.1	52	LLSELsRRRIR
eIF5B	EIF5B	NP_056988.3	1168	PIPGEsPKMFG
eRF1	ETF1	NP_004721.1	295	YFDEIsQDTGK
eRF1	ETF1	NP_004721.1	70	RVNRLsVLGAI
exd	PBX2	NP_002577.2	89	KPALFsVLCEI
exd	PBX3	XP_006717193.1	82	KPALFsVLCEI
FoxK	FOXK2	NP_004505.2	205	PTGTIsAANSC
Gapdh1	GAPDH	NP_002037.2	153	SNASCtTNCLA
Gapdh2	GAPDH	NP_002037.2	153	SNASCtTNCLA
Gapdh2	GAPDH	NP_002037.2	211	IIPAStGAAKA
GlnRS	QARS	NP_005042.1	520	RLFTLtALRRR
Hel25E	DDX39A	NP_005795.2	343	RILVAtNLFGR
Hel25E	DDX39A	NP_005795.2	43	YVSIHsSGFRD
Hel25E	DDX39A	NP_005795.2	44	VSIHSsGFRDF
Hel25E	DDX39B	NP_004631.1	172	HIVVGtPGRIL
Hel25E	DDX39B	NP_004631.1	344	RILVAtNLFGR
Hel25E	DDX39B	NP_004631.1	44	YVSIHsSGFRD
Hel25E	DDX39B	NP_004631.1	45	VSIHSsGFRDF
His2Av	H2AFV	NP_036544.1	99	DEELDsLIKAT
His3.3A	H3F3B	NP_005315.1	11	QTARKsTGGKA
His3:CG33848	HIST2H3D	NP_001116847.1	11	QTARKsTGGKA
His3:CG33848	HIST2H3D	NP_001116847.1	29	KAARKsAPATG
His4:CG33881	HIST1H4C	NP_003533.1	48	GVKRIsGLIYE
His4:CG33887	HIST1H4A	NP_003529.1	48	GVKRIsGLIYE
His4:CG33887	HIST1H4A	NP_003529.1	81	HAKRKtVTAMD
His4:CG33887	HIST1H4A	NP_003529.1	83	KRKTVtAMDVV
His4:CG33887	HIST1H4C	NP_003533.1	48	GVKRIsGLIYE
His4:CG33887	HIST1H4C	NP_003533.1	81	HAKRKtVTAMD
His4:CG33887	HIST1H4C	NP_003533.1	83	KRKTVtAMDVV
Hsc70-1	HSPA8	NP_006588.1	153	AYFNDsQRQAT
Hsc70-1	HSPA8	NP_006588.1	362	KELNKsINPDE
Hsc70-2	HSPA1A	NP_005336.3	153	AYFNDsQRQAT
Hsc70-2	HSPA1B	NP_005337.2	153	AYFNDsQRQAT
Hsc70-4	HSPA8	NP_006588.1	153	AYFNDsQRQAT
Hsc70-4	HSPA8	NP_006588.1	163	TKDAGtIAGLN
Hsc70-4	HSPA8	NP_006588.1	362	KELNKsINPDE
Hsc70-5	HSPA9	NP_004125.3	200	AYFNDsQRQAT
Hsp68	HSPA1A	NP_005336.3	153	AYFNDsQRQAT
Hsp68	HSPA1B	NP_005337.2	153	AYFNDsQRQAT
Hsp70Aa	HSPA1A	NP_005336.3	153	AYFNDsQRQAT
Hsp70Aa	HSPA1B	NP_005337.2	153	AYFNDsQRQAT
Hsp70Aa	HSPA1L	NP_005518.3	155	AYFNDsQRQAT
Hsp70Ba	HSPA1A	NP_005336.3	153	AYFNDsQRQAT
Hsp70Ba	HSPA1B	NP_005337.2	153	AYFNDsQRQAT
Hsp70Bbb	HSPA1A	NP_005336.3	153	AYFNDsQRQAT
Hsp70Bbb	HSPA1B	NP_005337.2	153	AYFNDsQRQAT
Hsp70Bc	HSPA1A	NP_005336.3	153	AYFNDsQRQAT
Hsp70Bc	HSPA1B	NP_005337.2	153	AYFNDsQRQAT
Hsp83	HSP90AB1	NP_031381.2	285	EELNKtKPIWT
Hsp83	HSP90AB1	NP_031381.2	391	LPLNIsREMLQ
kcc	SLC12A4	NP_001139434.1	928	YTYERtLMMEQ
Khc	KIF5B	NP_004512.1	257	KNINKsLSALG
Klp10A	KIF2A	NP_001091981.1	484	AEINKsLLALK
Klp59D	KIF2A	NP_001091981.1	484	AEINKsLLALK
kn	EBF3	XP_006717802.1	315	AIRVQtPPRHI
mask	ANKRD17	NP_115593.3	1457	ANKNAsILLEE
Mcm6	MCM6	NP_005906.2	498	LNARTsILAAA
Med	SMAD4	NP_005350.1	138	YERVVsPGIDL
Nacalpha	NACA	XP_006719475.1	1962	VTIRKsKNILF
Nop56	NOP56	NP_006383.2	316	HAGSLtNLAKY
pAbp	PABPC4	NP_001129125.1	364	GSKPLyVALAQ
Pdcd4	PDCD4	NP_055271.2	457	RKRFVsEGDGG
pic	DDB1	NP_001914.3	645	TFRSLsTTNVF
Pli	PELI2	NP_067078.1	82	HSISYtLSRNQ
Pp2B-14D	PPP3CA	NP_000935.1	411	MARVFsVLREE
Prosalpha2	PSMA2	NP_002778.1	14	SLTTFsPSGKL
Prosalpha3	PSMA4	NP_002780.1	13	RTTIFsPEGRL
Prosalpha3T	PSMA4	NP_002780.1	13	RTTIFsPEGRL
Prosalpha5	PSMA5	NP_002781.2	16	GVNTFsPEGRL
Prp31	PRPF31	NP_056444.3	451	SGTASsVAFTP
Prp31	PRPF31	NP_056444.3	455	SSVAFtPLQGL
Prx5	PRDX5	NP_036226.1	101	FTPGCsKTHLP
Rab10	RAB10	NP_057215.3	73	QERFHtITTSY
Rab10	RAB10	NP_057215.3	75	RFHTItTSYYR
Rab11	RAB11A	NP_004654.1	78	YRAITsAYYRG
Rab7	RAB7A	NP_004628.4	72	QERFQsLGVAF
Rac1	RAC1	NP_061485.1	64	AGQEDyDRLRP
Rac1	RAC2	NP_002863.1	64	AGQEDyDRLRP
Rac2	RAC1	NP_061485.1	64	AGQEDyDRLRP
Ran	RAN	XP_016875261.1	135	KVKAKsIVFHR
Rho1	RHOA	NP_001655.1	34	QFPEVyVPTVF
Rho1	RHOA	NP_001655.1	66	AGQEDyDRLRP
RpL10	RPL10	NP_001243506.2	104	INKMLsCAGAD
RpL10	RPL10L	NP_542784.1	104	INKMLsCAGAD
RpL23	RPL23	NP_000969.1	115	GEMKGsAITGP
RpL40	UBA52	XP_016882687.1	112	NIQKEsTLHLV
Rpn11	PSMD14	NP_005796.1	178	EPRQTtSNLGH
RpS14b	RPS14	XP_016865173.1	114	GPGAQsALRAL
RpS15	RPS15	NP_001295155.1	146	GATHSsRFIPL
RpS23	RPS23	NP_001016.1	129	KVANVsLLALY
RpS26	RPS26	NP_001020.2	76	LHYCVsCAIHS
RpS27A	RPS27A	NP_002945.1	65	NIQKEsTLHLV
RpS3A	RPS3A	NP_000997.1	70	RVFEVsLADLQ
RpS4	RPS4X	NP_000998.1	32	FAPRPsTGPHK
RpS4	RPS4X	NP_000998.1	33	APRPStGPHKL
Rpt3	PSMC4	NP_006494.1	350	FSTITsKMNLS
Rpt4	PSMC6	NP_002797.3	258	GGRRFsEGTSA
Rpt4R	PSMC6	NP_002797.3	258	GGRRFsEGTSA
Rpt6	PSMC5	NP_002796.4	109	DINDVtPNCRV
SkpA	SKP1	NP_733779.1	131	MIKGKtPEEIR
Snap24	SNAP25	NP_003072.2	28	DESLEsTRRML
Snx3	SNX12	NP_037478.2	73	VRRRYsDFEWL
Tcp-1eta	CCT7	NP_006420.1	219	VAFKKtFSYAG
Tcp-1eta	CCT7	NP_006420.1	221	FKKTFsYAGFE
Tcs3	OSGEP	NP_060277.1	203	KGMDVsFSGIL
TER94	VCP	NP_009057.1	748	ARRSVsDNDIR
THG	THG1L	NP_060342.2	174	LKDYLsWRQAD
ThrRS	TARS	NP_001245367.1	483	LSGALtGLTRV
tral	LSM14B	XP_011526907.1	444	ERKLNtETFGV
Trap1	TRAP1	NP_057376.2	401	IPLNLsRELLQ
U2af38	U2AF1	NP_006749.1	19	DKVNCsFYFKI
U2af38	U2AF1L4	NP_659424.2	19	DKVNCsFYFKI
Ubi-p5E	UBC	NP_066289.3	217	NIQKEsTLHLV
Ubi-p63E	UBC	NP_066289.3	65	NIQKEsTLHLV
ValRS	VARS	XP_005249419.1	867	RKMSKsLGNVI
Vha55	ATP6V1B2	NP_001684.2	103	VFEGTsGIDAK
